# Supplementary material
Source: PubMed Central journal article supplement (PMC2813312)
Supplement: NIHMS163156-supplement-02.pdf [file NIHMS163156-supplement-02.pdf]

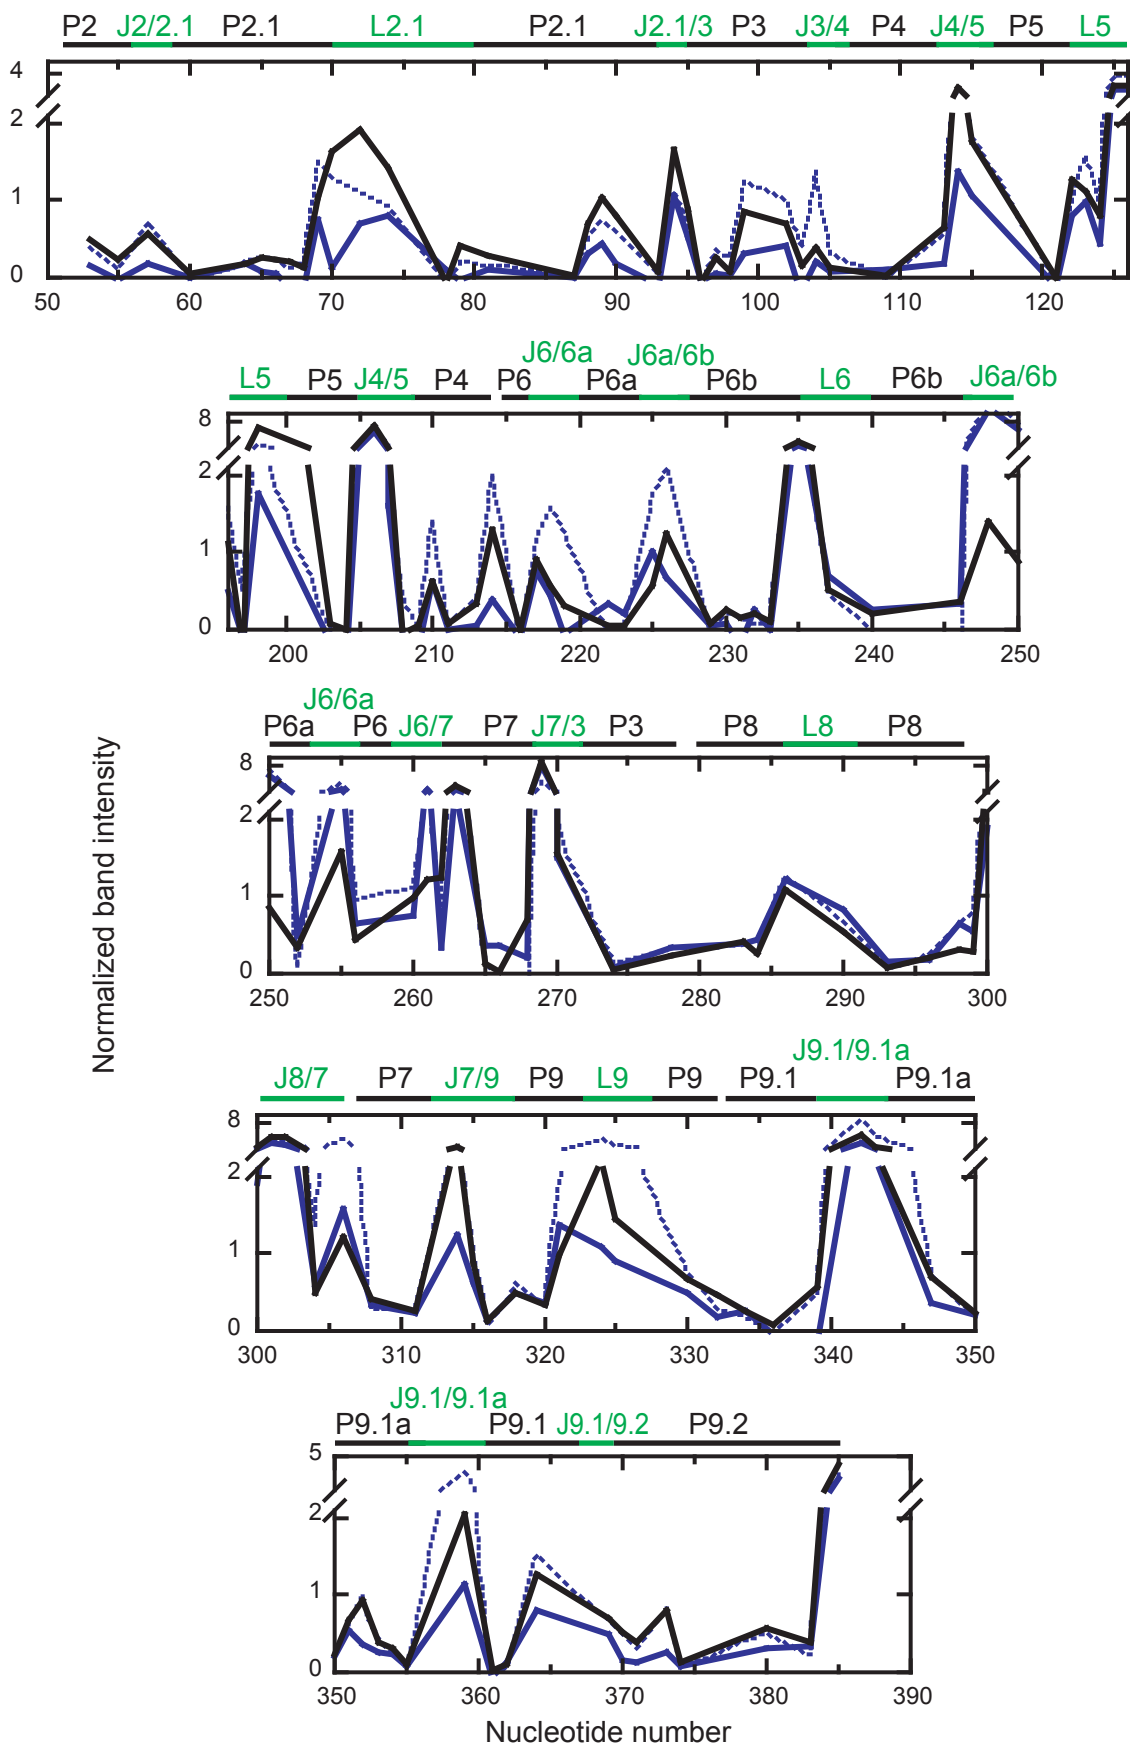

Fig. S2. DMS footprinting of the native ribozyme and its complexes with CYT-18 and P5abc. Dashed blue lines, native ribozyme; solid blue line, native ribozyme in complex with CYT-18 (both reproduced from Fig. S1); solid black line, native ribozyme in complex with P5abc. Band intensities were normalized as in Fig. 8 and Fig. S1. Secondary structure elements are indicated in black and loops and joining sequences are indicated in green.
